# Supplementary material for: Studies on application of fish waste for synthesis of high quality biodiesel
Source: Royal Society of Chemistry journal article supplement (doi:10.1039/c4ra03590a), 2014-01-01
Supplement: c4ra03590a1.pdf [file c4ra03590a1.pdf]

Table S<sub>1</sub>: Optimization of reaction conditions at calcinations temperature of 600 °C

| Run | Catalyst concentration<br>(wt.% of oil) | Methanol to oil<br>molar ratio | FAME yield<br>(%) |
|-----|-----------------------------------------|--------------------------------|-------------------|
| 1   | 1                                       | 5.5                            | 23.05             |
| 2   | 1                                       | 6.0                            | 25.28             |
| 3   | 1                                       | 6.5                            | 29.64             |
| 4   | 1.50                                    | 5.5                            | 24.31             |
| 5   | 1.50                                    | 6.0                            | 27.38             |
| 6   | 1.50                                    | 6.5                            | 30.63             |
| 7   | 2.00                                    | 5.5                            | 23.25             |
| 8   | 2.00                                    | 6.0                            | 26.65             |
| 9   | 2.00                                    | 6.5                            | 30.23             |

Table S<sub>2</sub>: Optimization of reaction conditions at calcinations temperature of 800 °C

| Run | Catalyst concentration (wt% of oil) | Methanol to oil molar ratio | FAME (%) |
|-----|-------------------------------------|-----------------------------|----------|
| 1   | 1.0                                 | 5.5                         | 73.63    |
| 2   | 1.0                                 | 6.0                         | 75.52    |
| 3   | 1.0                                 | 6.5                         | 81.23    |
| 4   | 1.5                                 | 5.5                         | 80.56    |
| 5   | 1.5                                 | 6.0                         | 85.52    |
| 6   | 1.5                                 | 6.5                         | 88.89    |
| 7   | 2.0                                 | 5.5                         | 79.58    |
| 8   | 2.0                                 | 6.0                         | 84.56    |
| 9   | 2.0                                 | 6.5                         | 88.58    |

Table S<sub>3</sub>: Optimization of reaction conditions at calcinations temperature of 900 °C

| Run | Catalyst concentration (wt% of oil) | Methanol to oil molar ratio | FAME (%) |
|-----|-------------------------------------|-----------------------------|----------|
| 1   | 1.0                                 | 5.5                         | 88.36    |
| 2   | 1.0                                 | 6.0                         | 90.26    |
| 3   | 1.0                                 | 6.5                         | 91.78    |
| 4   | 1.5                                 | 5.5                         | 89.65    |
| 5   | 1.5                                 | 6.0                         | 93.62    |
| 6   | 1.5                                 | 6.5                         | 96.47    |
| 7   | 2.0                                 | 5.5                         | 90.56    |
| 8   | 2.0                                 | 6.0                         | 93.31    |
| 9   | 2.0                                 | 6.5                         | 95.04    |
